# Supplementary material for: Room temperature sphere-to-rod growth of Pluronic® P85 micelles induced by salicylic acid
Source: Royal Society of Chemistry journal article supplement (doi:10.1039/c2sm25517k), 2012-01-01
Supplement: c2sm25517k.pdf [file c2sm25517k.pdf]

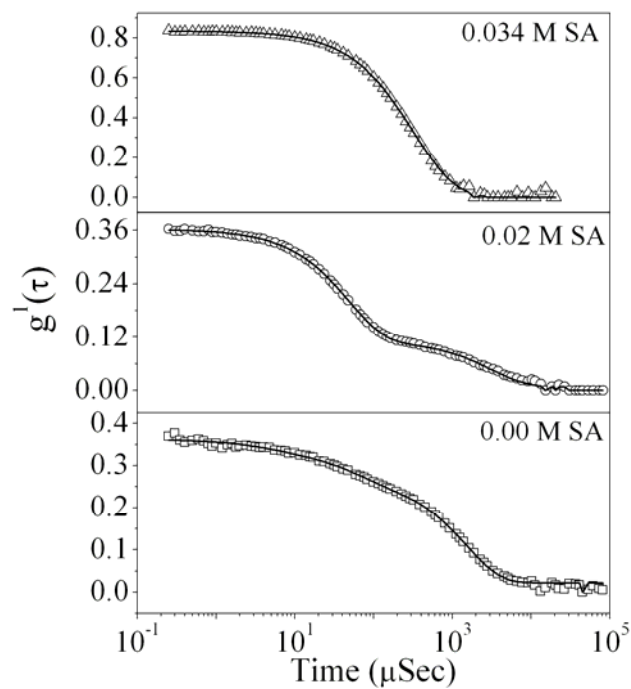

**Figure A:** Correlation function diagram of 1% P85 solution recorded at 30°C and at 130° scattering angle as a function salicylic acid (SA) concentration. The solid lines represent fit to the data based on CONTIN analysis.

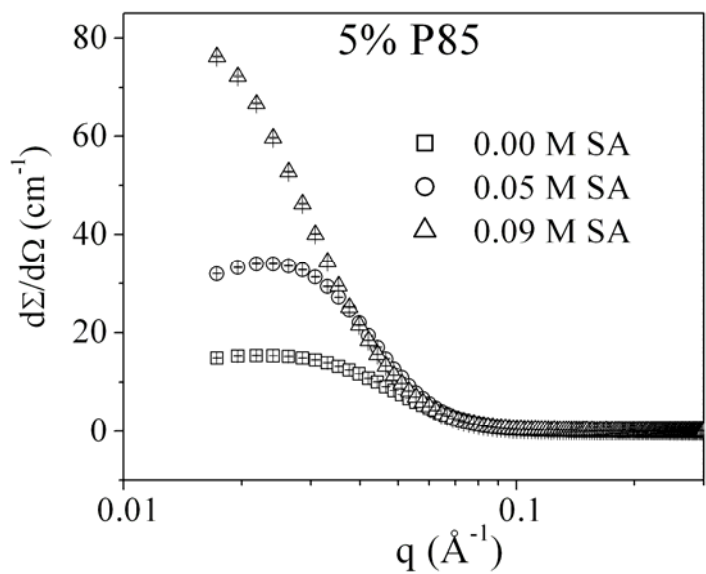

**Figure B:** SANS data of 5% aqueous P85 solutions at 30°C as a function of salicylic acid concentration along with their error bars.
